# Supplementary material
Source: publisher figshare collection journal article supplement (https://gsapubs.figshare.com/ndownloader/files/22747946)
Supplement: Supplementary file 1 [file 22747946]

## Sheet: CPCP1A ICP-MS data
Data repository 2: U-Pb zircon geochronology and depositional age models for the Upper Triassic Chinle Formation (Petrified Forest National Park, Arizona, USA): implications for Late Triassic paleoecological and paleoenvironmental change
Cornelia Rasmussen1,2,3†, Roland Mundil4, Randall B. Irmis1,2, Dominique Geisler5, George E. Gehrels5, Paul E. Olsen6, Dennis V. Kent6,7, Christopher Lepre6,7, Sean T. Kinney6, John W. Geissmann8,9, and William G. Parker10
1Department of Geology & Geophysics, University of Utah, Salt Lake City, UT 84112-0102, USA; 2Natural History Museum of Utah, University of Utah, Salt Lake City, UT 84108-1214, USA; 3Institute for Geophysics, Jackson School of Geosciences, University of Texas at Austin, Austin, Texas 78758, USA, 4Berkeley Geochronology Center, Berkeley, CA 94709; 5Department of Geosciences, University of Arizona,…
Table DR1: Summary of radiogenic isotope ratios and ages including their uncertainties obtained via LA-ICP-MS analyses. The order of spot numbers is based on the youngest to oldest CA-TIMS age within the individual sample (see also data repository file 2: Table DR2).
Analysis	207Pb*	±	206Pb*	±	error	206Pb*	±	206Pb	U/Th	U	206Pb*	±	207Pb*	±	206Pb*	±	Best age	±
	235U*	(%)	238U	(%)	corr.	207Pb*	(%)	204Pb		(ppm)	238U*	(Ma)	235U	(Ma)	207Pb*	(Ma)	(Ma)	(Ma)
52Q-2-Spot 020	0.221863	2.72778	0.0322409	1.51177	0.554213	20.0279	2.27053	7596.47	0.505474	39.5173	204.558	3.04389	203.459	5.02926	191.779	52.8205	204.558	3.04389
52Q-2-Spot 221	0.217775	2.03875	0.0317314	1.28189	0.628764	20.0814	1.58533	8197.04	0.474903	117.226	201.375	2.54151	200.056	3.70201	185.524	36.9174	201.375	2.54151
52Q-2-Spot 204	0.229244	1.8575	0.0323419	1.06969	0.575875	19.4438	1.51858	19940.2	0.865963	113.284	205.189	2.16032	209.574	3.5174	260.188	34.9058	205.189	2.16032
52Q-2-Spot 155	0.229146	1.43804	0.0326981	0.952461	0.662334	19.6662	1.07739	14258.2	1.99451	278.136	207.413	1.94408	209.494	2.72214	233.994	24.8679	207.413	1.94408
52Q-2-Spot 108	0.233757	1.74354	0.0325593	1.28891	0.739249	19.1966	1.17415	45752.5	1.57376	161.085	206.546	2.62	213.295	3.35426	289.476	26.825	206.546	2.62
52Q-2-Spot 057	0.21393	2.26508	0.0319349	1.34981	0.595924	20.5734	1.81895	4859.42	0.706746	83.3579	202.647	2.69281	196.845	4.05315	128.915	42.7773	202.647	2.69281
52Q-2-Spot 052	0.23709	2.37419	0.0323148	1.41754	0.597062	18.7845	1.90456	13546.7	1.68006	64.4799	205.02	2.86051	216.035	4.6202	338.816	43.136	205.02	2.86051
52Q-2-Spot 201	0.223278	2.18731	0.0324339	1.55233	0.709698	20.02	1.54097	6105.55	0.676784	100.979	205.763	3.14369	204.635	4.05382	192.691	35.8491	205.763	3.14369
52Q-2-Spot 141	0.223444	3.16212	0.0328761	1.24551	0.393885	20.278	2.9065	6669.1	0.859434	58.5683	208.524	2.55564	204.772	5.86406	162.794	67.9488	208.524	2.55564
52Q-2-Spot 115	0.184442	7.39383	0.031994	1.37178	0.18553	23.9068	7.26547	1461.26	1.03433	39.8458	203.016	2.74154	171.876	11.6914	NA	NA	203.016	2.74154
52Q-2-Spot 314	0.228911	1.82666	0.0326446	1.40163	0.767318	19.6542	1.17138	13908.1	2.06589	267.617	207.079	2.85635	209.3	3.4549	235.4	27.0183	207.079	2.85635
158Q-2-Spot 055	0.232254	2.62056	0.0330976	1.69059	0.645125	19.6402	2.00231	27722.9	0.588801	57.8567	209.906	3.4915	212.058	5.01523	237.019	46.1902	209.906	3.4915
158Q-2-Spot 276	0.20853	3.41833	0.0327898	1.41264	0.413254	21.6712	3.11279	2485.63	0.8962	38.4785	207.985	2.89118	192.318	5.98907	5.16852	74.9496	207.985	2.89118
158Q-2-Spot 168	0.224848	3.57405	0.0328567	1.51679	0.424391	20.1395	3.23623	6739.72	0.909111	32.0056	208.403	3.11049	205.936	6.66197	178.794	75.4731	208.403	3.11049
158Q-2-Spot 233	0.236053	2.23924	0.0329957	1.70367	0.760825	19.2646	1.45317	13282	0.556675	226.999	209.27	3.50803	215.183	4.34216	281.407	33.2477	209.27	3.50803
158Q-2-Spot 142	0.224148	2.37318	0.0326396	1.29967	0.547649	20.0688	1.98566	5813.08	0.928003	75.5243	207.047	2.64818	205.356	4.4123	186.985	46.2314	207.047	2.64818
158Q-2-Spot 120	0.235232	2.04018	0.0331206	1.323	0.648473	19.405	1.55306	10886.5	0.854679	70.2335	210.049	2.73417	214.509	3.94501	264.759	35.6691	210.049	2.73417
158Q-2-Spot 093	0.230548	1.89832	0.0329666	1.21212	0.638522	19.7072	1.46095	71685	1.29261	84.8442	209.088	2.49374	210.651	3.61131	229.147	33.7425	209.088	2.49374
158Q-2-Spot 015	0.227436	1.64289	0.0329525	1.10307	0.67142	19.9683	1.2175	10923.6	1.06937	218.622	209.001	2.26845	208.08	3.091	198.677	28.2904	209.001	2.26845
158Q-2-Spot 262	0.230177	2.6352	0.0329466	1.84857	0.701491	19.7271	1.87805	13618.6	2.10574	206.278	208.964	3.80091	210.344	5.00658	226.852	43.404	208.964	3.80091
158Q-2-Spot 236	0.208883	3.49899	0.0333261	1.67343	0.47826	21.9884	3.07288	2121	1.08759	32.3447	211.332	3.47914	192.615	6.139	NA	NA	211.332	3.47914
158Q-2-Spot 240	0.217756	3.51073	0.0316648	3.20245	0.912189	20.041	1.43859	18604	1.98518	129.556	200.959	6.33634	200.04	6.37445	190.258	33.4696	200.959	6.33634
158Q-2-Spot 161	0.231935	3.93241	0.0324668	1.48656	0.378027	19.2924	3.6406	4515.93	0.681895	33.9457	205.969	3.01344	211.795	7.51753	278.116	83.3577	205.969	3.01344
158Q-2-Spot 163	0.230353	3.53394	0.0321304	3.07391	0.869825	19.2236	1.7435	22475.6	1.0187	181.968	203.868	6.16867	210.49	6.7183	286.238	39.8641	203.868	6.16867
158Q-2-Spot 157	0.217317	3.99402	0.0330206	1.6573	0.414946	20.9413	3.63394	4916.86	0.580311	83.7284	209.425	3.41504	199.674	7.23997	87.0479	86.1838	209.425	3.41504
177Q-1-Spot 168	0.264489	2.44604	0.0332429	1.23536	0.505048	17.3222	2.11115	10233.5	1.05547	255.628	210.813	2.56218	238.278	5.19505	519.487	46.3453	210.813	2.56218
177Q-1-Spot 108	0.231779	2.01623	0.0335022	1.43453	0.71149	19.921	1.4168	18980.6	1.62868	378.381	212.43	2.9977	211.667	3.85225	204.166	32.879	212.43	2.9977
182Q-1-Spot 182	0.233521	1.9473	0.0336498	1.16377	0.59763	19.8595	1.56129	75597.9	0.844733	342.993	213.351	2.44226	213.101	3.74321	211.352	36.2039	213.351	2.44226
182Q-1-Spot 265	0.230522	2.50904	0.0333877	1.39439	0.555747	19.9612	2.08589	131223	1.72775	142.453	211.716	2.90419	210.629	4.77269	199.485	48.471	211.716	2.90419
182Q-1-Spot 197	0.226188	2.14027	0.0336696	1.41706	0.662094	20.5154	1.60397	24267.5	1.72465	245.17	213.474	2.97552	207.047	4.00879	135.501	37.6718	213.474	2.97552
182Q-1-Spot 263	0.230173	2.82697	0.0336574	1.47614	0.522164	20.153	2.41097	164255	1.28675	105.157	213.398	3.09849	210.341	5.37085	177.232	56.2382	213.398	3.09849
182Q-1-Spot 005	0.230272	1.78761	0.0334668	1.14717	0.641735	20.0302	1.37097	48815.2	0.976339	406.146	212.209	2.39478	210.423	3.39739	191.506	31.8788	212.209	2.39478
182Q-1-Spot 269	0.22527	2.72087	0.0336075	1.55366	0.571016	20.5611	2.23367	35629.3	0.900613	53.7658	213.087	3.25652	206.286	5.07939	130.307	52.5469	213.087	3.25652
182Q-1-Spot 273	0.233974	2.1046	0.0336264	1.59018	0.755572	19.8073	1.37865	29225.9	1.41043	337.094	213.205	3.33489	213.474	4.05195	217.452	31.936	213.205	3.33489
182Q-1-Spot 216	0.230952	2.39241	0.0332495	1.46881	0.613944	19.8416	1.88845	26489.5	1.01732	231.73	210.854	3.04693	210.984	4.55774	213.47	43.7699	210.854	3.04693
196Q-3-Spot 001	0.232924	2.14465	0.0334223	1.15236	0.537319	19.7758	1.80875	49104.5	0.729598	110.608	211.932	2.40251	212.609	4.11401	221.107	41.8579	211.932	2.40251
196Q-3-Spot 018	0.23357	2.43639	0.0338004	1.86259	0.764488	19.9443	1.57059	29733.3	1.72919	200.446	214.29	3.92575	213.141	4.68418	201.479	36.4821	214.29	3.92575
196Q-3-Spot 016	0.237345	2.04278	0.0338217	1.37041	0.670858	19.6394	1.5149	32610.9	0.986471	219.752	214.422	2.89014	216.244	3.97871	237.125	34.9301	214.422	2.89014
196Q-3-Spot 006	0.234829	1.60006	0.0335609	1.27974	0.799806	19.6968	0.960451	92946.3	0.768292	334.393	212.796	2.67879	214.177	3.08968	230.368	22.1813	212.796	2.67879
196Q-3-Spot 011	0.233176	2.03357	0.034028	1.2213	0.600573	20.1124	1.62598	61409.3	0.51539	258.744	215.709	2.59087	212.817	3.90435	181.924	37.895	215.709	2.59087
196Q-3-Spot 019	0.239531	3.22769	0.0345649	1.26816	0.392901	19.8878	2.96812	48401.8	0.418057	66.91	219.056	2.73131	218.036	6.33332	208.03	68.8436	219.056	2.73131
196Q-3-Spot 039	0.237704	2.90089	0.0339621	1.74865	0.602797	19.6911	2.31461	32329.4	0.998501	66.7704	215.298	3.70264	216.539	5.657	231.031	53.4651	215.298	3.70264
196Q-3-Spot 004	0.237312	1.83261	0.0335493	1.22207	0.666848	19.4839	1.36565	54302.7	0.968813	276.275	212.724	2.55722	216.217	3.56897	255.44	31.3927	212.724	2.55722
201Q-1-Spot 075	0.223864	2.24122	0.0333911	1.2599	0.562152	20.5569	1.85356	22177.6	1.49947	119.383	211.737	2.62435	205.121	4.16263	130.799	43.5767	211.737	2.62435
201Q-1-Spot 006	0.253295	2.48709	0.0354399	1.49619	0.601583	19.2832	1.98672	58386.7	1.49256	154.981	224.505	3.30121	229.249	5.10386	279.205	45.4683	224.505	3.30121
201Q-1-Spot 206	0.23036	2.32107	0.0332388	1.37373	0.59185	19.8861	1.8709	26411.5	0.940229	188.561	210.787	2.8488	210.496	4.41261	208.27	43.4068	210.787	2.8488
201Q-1-Spot 155	0.242526	2.74374	0.0339664	1.54253	0.562198	19.302	2.26908	18726.7	1.01459	176.449	215.325	3.26658	220.487	5.43789	276.966	51.9804	215.325	3.26658
201Q-1-Spot 134	0.228562	2.61233	0.0341534	1.47636	0.56515	20.5941	2.15514	14747.5	1.86151	128.433	216.491	3.1431	209.011	4.93477	126.546	50.7343	216.491	3.1431
201Q-1-Spot 059	0.237403	2.24325	0.0338705	1.08833	0.485158	19.6629	1.96156	63306.9	1.73151	128.722	214.727	2.29845	216.292	4.37005	234.388	45.2942	214.727	2.29845
201Q-1-Spot 120	0.244628	2.03694	0.0341416	1.54534	0.758658	19.2349	1.32704	29629.2	0.745622	445.872	216.417	3.28887	222.203	4.06516	284.9	30.3514	216.417	3.28887
201Q-1-Spot 065	0.238909	1.68519	0.0334643	1.26522	0.750788	19.3046	1.11314	32188.3	2.79838	768.265	212.193	2.64101	217.526	3.29969	276.659	25.506	212.193	2.64101
201Q-1-Spot 093	0.240334	2.31072	0.0339101	1.38907	0.601144	19.4458	1.84659	24374.3	1.79077	205.735	214.974	2.93691	218.694	4.54629	259.903	42.4228	214.974	2.93691
201Q-1-Spot 176	0.235383	2.57864	0.0341859	1.83798	0.712773	20.0164	1.80864	59105.9	1.47897	169.579	216.693	3.91659	214.632	4.98881	193.114	42.0745	216.693	3.91659
201Q-1-Spot 022	0.234782	1.75657	0.0340669	1.32249	0.752879	19.9977	1.1561	25222.1	2.13902	243.95	215.952	2.80863	214.138	3.39134	195.28	26.8943	215.952	2.80863
201Q-1-Spot 052	0.235222	2.72385	0.0339385	1.60993	0.591048	19.8851	2.19716	14660.5	3.27725	78.0816	215.151	3.40661	214.5	5.26684	208.396	50.9372	215.151	3.40661
201Q-1-Spot 164	0.237578	1.74069	0.0342043	1.18348	0.679893	19.8421	1.27647	48306.3	1.52501	492.325	216.808	2.52321	216.435	3.39302	213.41	29.5943	216.808	2.52321
201Q-1-Spot 040	0.231867	2.59583	0.033641	1.88157	0.724845	19.9959	1.7883	32563.3	3.33581	126.953	213.296	3.94764	211.739	4.96118	195.49	41.5824	213.296	3.94764
215Q-2-Spot 214	0.243854	1.95667	0.0339764	1.26767	0.647874	19.2026	1.49049	18885.1	1.32155	183.91	215.387	2.6853	221.572	3.89502	288.759	34.0816	215.387	2.6853
215Q-2-Spot 163	0.237842	2.29607	0.0338042	1.3863	0.603771	19.5882	1.83033	19291.1	3.07857	117.858	214.313	2.92219	216.651	4.47962	243.161	42.1825	214.313	2.92219
215Q-2-Spot 118	0.230939	1.9689	0.0339495	1.26628	0.64314	20.2604	1.50769	15420.4	1.82291	165.484	215.219	2.68029	210.974	3.75074	164.821	35.2277	215.219	2.68029
215Q-2-Spot 046	0.236449	2.48043	0.0345057	1.53145	0.617415	20.1125	1.9512	99126.4	2.38784	114.384	218.687	3.29292	215.509	4.81639	181.92	45.4719	218.687	3.29292
215Q-2-Spot 235	0.240759	2.15158	0.034135	1.47151	0.683923	19.5403	1.56969	13065.1	2.60462	105.864	216.376	3.13116	219.041	4.2392	248.804	36.1367	216.376	3.13116
215Q-2-Spot 188	0.23717	1.84159	0.034061	1.25987	0.684121	19.7929	1.3432	23986	0.879218	199.887	215.915	2.67519	216.1	3.58471	219.136	31.0845	215.915	2.67519
215Q-2-Spot 232	0.230931	1.7894	0.0339119	1.30416	0.728825	20.2387	1.2252	24132.8	1.09807	265.43	214.985	2.75751	210.967	3.40868	167.325	28.633	214.985	2.75751
215Q-2-Spot 167	0.230263	2.60978	0.0330039	1.55397	0.595442	19.7539	2.09669	14420.6	1.83393	95.3861	209.321	3.20055	210.416	4.95979	223.704	48.4855	209.321	3.20055
215Q-2-Spot 047	0.238462	2.98187	0.0343044	1.55037	0.519932	19.8264	2.54714	24478.2	1.49035	71.1416	217.432	3.31479	217.16	5.82989	215.207	58.9805	217.432	3.31479
215Q-2-Spot 315	0.244142	2.25277	0.03421	1.43613	0.637495	19.3118	1.73566	36525	3.46192	116.932	216.844	3.06237	221.806	4.48872	275.759	39.7505	216.844	3.06237
215Q-2-Spot 182	0.232326	2.9801	0.0334128	1.47451	0.494785	19.8211	2.58976	16353.5	1.90676	66.1861	211.873	3.0733	212.117	5.70477	215.849	59.9591	211.873	3.0733
215Q-2-Spot 104	0.239172	2.66681	0.0338886	1.50623	0.564806	19.5279	2.20071	9639.2	1.81022	66.8072	214.84	3.18266	217.742	5.22642	250.213	50.6546	214.84	3.18266
215Q-2-Spot 231	0.234453	2.02101	0.034227	1.16007	0.574002	20.1199	1.65491	97179.6	1.15317	146.497	216.95	2.47488	213.868	3.89746	181.057	38.5713	216.95	2.47488
215Q-2-Spot 050	0.238185	2.143	0.0337738	1.26318	0.589443	19.5424	1.73114	37129.7	2.35343	131.695	214.124	2.66034	216.933	4.18586	248.555	39.8513	214.124	2.66034
215Q-2-Spot 192	0.234665	2.66738	0.033815	1.50516	0.564285	19.8597	2.20214	19633.1	1.78775	58.0257	214.381	3.17372	214.043	5.14776	211.338	51.0331	214.381	3.17372
215Q-2-Spot 190	0.243029	2.93392	0.0339313	1.62055	0.55235	19.2422	2.44575	7058.17	1.09152	69.8944	215.106	3.42838	220.898	5.82452	284.062	55.9608	215.106	3.42838
215Q-2-Spot 092	0.238428	4.07538	0.0341623	2.39653	0.58805	19.7471	3.29627	22017.3	1.74231	26.4206	216.546	5.10339	217.132	7.96697	224.522	76.2476	216.546	5.10339
215Q-2-Spot 055	0.232348	3.49642	0.0337047	1.90353	0.544422	19.9924	2.93284	18598.3	1.50615	38.5226	213.693	4.00103	212.135	6.69368	195.902	68.1558	213.693	4.00103
227Q-3-Spot 242	0.259759	3.79208	0.0342231	1.77972	0.469325	18.1577	3.3485	20766.9	1.12874	22.6349	216.925	3.79643	234.473	7.93962	415.17	74.8329	216.925	3.79643
227Q-3-Spot 243	0.235375	2.55978	0.0337498	1.50035	0.586123	19.7617	2.07399	62953.7	0.728793	75.6301	213.974	3.15766	214.626	4.95219	222.778	47.9683	213.974	3.15766
227Q-3-Spot 265	0.266914	2.63912	0.0333527	1.54483	0.585356	17.2216	2.13974	23661.8	1.5005	260.848	211.498	3.21426	240.223	5.6457	532.302	46.8625	211.498	3.21426
227Q-3-Spot 292	0.234396	2.32585	0.0324517	1.48716	0.639406	19.0809	1.78827	90168.9	1.43285	263.295	205.874	3.01331	213.821	4.48445	303.284	40.7545	205.874	3.01331
227Q-3-Spot 286	0.238287	2.42476	0.034023	1.68127	0.693372	19.6781	1.74724	18329.2	0.728677	194.646	215.678	3.56613	217.017	4.73786	232.552	40.3153	215.678	3.56613
243Q-2-Spot 132	0.22798	2.00479	0.0333202	1.61237	0.804259	20.1429	1.1914	10697.5	0.812488	187.122	211.295	3.35162	208.53	3.77925	178.395	27.7563	211.295	3.35162
243Q-2-Spot 215	0.238669	2.136	0.0338062	1.33744	0.62614	19.5215	1.66546	16275.7	2.60602	88.6795	214.326	2.81935	217.33	4.17902	250.971	38.3273	214.326	2.81935
243Q-2-Spot 243	0.241024	1.81318	0.0337408	1.19816	0.660806	19.2934	1.3609	16996.8	0.927244	114.614	213.918	2.52103	219.258	3.57564	277.996	31.1569	213.918	2.52103
243Q-2-Spot 098	0.225032	2.59927	0.0335141	1.15262	0.44344	20.5256	2.32973	7874.88	3.1931	124.844	212.504	2.40944	206.089	4.84821	134.347	54.7655	212.504	2.40944
243Q-2-Spot 052	0.238968	1.27305	0.0333553	0.8563	0.672635	19.237	0.942027	311002	0.771648	255.27	211.514	1.7818	217.575	2.4932	284.689	21.5301	211.514	1.7818
243Q-2-Spot 235	0.229225	1.86378	0.0334806	0.955937	0.512903	20.13	1.59995	11068	2.32517	151.525	212.295	1.99636	209.559	3.52904	179.895	37.2953	212.295	1.99636
243Q-2-Spot 116	0.22762	2.14343	0.0337507	1.30705	0.609795	20.4355	1.6988	12233.9	1.13925	163.151	213.98	2.75092	208.232	4.03541	144.669	39.8558	213.98	2.75092
243Q-2-Spot 103	0.236137	1.93417	0.0335222	1.09818	0.567781	19.5651	1.59217	66962.4	1.24154	129.928	212.555	2.29618	215.252	3.75166	245.868	36.6919	212.555	2.29618
243Q-2-Spot 307	0.234162	1.32099	0.0338504	0.9886	0.748377	19.9232	0.87618	36008.9	1.48113	381.674	214.602	2.08663	213.628	2.54493	203.902	20.3445	214.602	2.08663
243Q-2-Spot 169	0.23495	1.99884	0.0338281	1.22518	0.612945	19.8433	1.57933	16237.2	0.66307	145.806	214.463	2.58432	214.277	3.86131	213.217	36.5897	214.463	2.58432
243Q-2-Spot 185	0.233713	1.64381	0.0335049	1.09632	0.666937	19.7577	1.22483	25789.6	2.30266	119.133	212.447	2.29114	213.259	3.16193	223.253	28.3235	212.447	2.29114
243Q-2-Spot 251	0.225276	1.90501	0.0339248	1.48051	0.777165	20.7545	1.19881	4923.8	1.52344	79.0517	215.065	3.13153	206.292	3.55639	108.225	28.3153	215.065	3.13153
243Q-2-Spot 079	0.224142	1.93355	0.0331766	1.4172	0.732952	20.3996	1.31536	10533.5	2.30335	140.863	210.399	2.93364	205.351	3.59484	148.842	30.8222	210.399	2.93364
243Q-2-Spot 224	0.243527	1.68277	0.0336632	1.11261	0.661175	19.0511	1.26247	30983.6	1.24276	126.652	213.435	2.33581	221.305	3.34618	306.838	28.7526	213.435	2.33581
243Q-2-Spot 105	0.231226	1.5707	0.0329821	1.2372	0.787676	19.6587	0.967692	91188.1	1.09385	268.422	209.185	2.5465	211.21	2.99517	234.881	22.3394	209.185	2.5465
243Q-2-Spot 036	0.228277	1.72977	0.0334566	1.32888	0.768243	20.1991	1.10733	11370.1	2.23841	223.958	212.145	2.77328	208.775	3.26426	171.897	25.844	212.145	2.77328
287Y-2-Spot 049	0.239559	2.83257	0.0345039	1.92604	0.679961	19.8503	2.07698	6136.71	0.964239	217.426	218.675	4.14113	218.06	5.55854	212.405	48.1293	218.675	4.14113
287Y-2-Spot 056	0.245529	2.02837	0.033977	1.3731	0.676946	19.0719	1.49295	173739	1.59341	579.328	215.391	2.90867	222.938	4.06003	304.329	34.0243	215.391	2.90867
287Y-2-Spot 063	0.242145	1.81199	0.0344334	1.44971	0.800065	19.5982	1.08703	31163.8	2.09817	801.96	218.236	3.11082	220.176	3.58666	241.957	25.0406	218.236	3.11082
287Y-2-Spot 045	0.23675	2.17974	0.0337851	1.80543	0.828277	19.6674	1.22135	203437	2.39315	914.786	214.194	3.80359	215.756	4.23689	233.862	28.1769	214.194	3.80359
297Y-2-Spot 200	0.234612	1.7237	0.0334661	1.08425	0.629024	19.6593	1.33998	81017.4	1.55178	338.066	212.205	2.26338	213.999	3.32593	234.81	30.9453	212.205	2.26338
297Y-2-Spot 234	0.238921	1.3535	0.0340819	1.07468	0.793999	19.6599	0.822818	350781	1.37681	678.707	216.045	2.28331	217.536	2.65033	234.736	18.9808	216.045	2.28331
297Y-2-Spot 212	0.238124	1.76131	0.0342283	1.12606	0.639331	19.8104	1.35433	22534.4	1.49209	271.461	216.958	2.40242	216.883	3.43959	217.095	31.371	216.958	2.40242
297Y-2-Spot 184	0.237101	1.69426	0.0339091	1.11321	0.657048	19.7104	1.27721	35823.5	0.641539	175.724	214.968	2.35358	216.044	3.29715	228.817	29.496	214.968	2.35358
297Y-2-Spot 305	0.244657	1.51928	0.0341927	0.990293	0.651815	19.2614	1.15219	439988	1.64029	306.945	216.736	2.11064	222.227	3.03235	281.795	26.3548	216.736	2.11064
297Y-2-Spot 162	0.240961	1.73861	0.0342633	1.19346	0.686448	19.5973	1.26428	443936	0.820735	322.492	217.176	2.54874	219.207	3.42784	242.089	29.1366	217.176	2.54874
297Y-2-Spot 277	0.23075	2.31882	0.0339303	1.23344	0.531927	20.2655	1.96355	7766.11	0.68992	89.9203	215.1	2.60935	210.818	4.41439	164.227	45.9154	215.1	2.60935
297Y-2-Spot 031	0.241325	2.37386	0.0339621	1.79664	0.756845	19.3957	1.55154	44196.8	0.511929	210.643	215.298	3.80426	219.505	4.68602	265.873	35.6164	215.298	3.80426
297Y-2-Spot 275	0.234636	2.10769	0.0338317	1.29782	0.615758	19.872	1.66072	21853.9	1.18076	239.275	214.485	2.73784	214.019	4.06719	209.887	38.5113	214.485	2.73784
297Y-2-Spot 229	0.245011	1.38107	0.0334327	0.921121	0.666962	18.8061	1.02902	50452.5	1.05564	775.639	211.997	1.92099	222.516	2.75968	336.263	23.3165	211.997	1.92099
297Y-2-Spot 246	0.254183	1.3638	0.0358368	1.01326	0.742962	19.431	0.91284	31425.9	0.870412	469.575	226.976	2.25983	229.968	2.80652	261.669	20.9823	226.976	2.25983
297Y-2-Spot 312	0.239803	1.64613	0.0342186	1.16529	0.707896	19.6661	1.16269	43982.7	1.42216	331.837	216.897	2.48543	218.259	3.23294	234.006	26.8427	216.897	2.48543
297Y-2-Spot 278	0.239997	1.79851	0.0344157	1.2102	0.672893	19.7635	1.33043	17605.4	1.1682	279.868	218.126	2.59561	218.418	3.53451	222.565	30.7508	218.126	2.59561
297Y-2-Spot 104	0.242173	1.82645	0.0337533	1.01224	0.554214	19.2089	1.52029	13946.2	0.508388	164.677	213.996	2.1306	220.198	3.61561	288.017	34.7592	213.996	2.1306
297Y-2-Spot 019	0.235132	1.79809	0.0332018	1.33063	0.740025	19.4608	1.20936	70881	1.03236	321.332	210.556	2.75646	214.427	3.4757	258.165	27.8048	210.556	2.75646
297Y-2-Spot 264	0.244795	3.24732	0.0341943	1.91222	0.58886	19.2515	2.62459	21306.7	1.03443	67.1744	216.745	4.07574	222.339	6.48432	282.971	60.0539	216.745	4.07574
297Y-2-Spot 078	0.245908	1.61233	0.0344015	1.24535	0.772395	19.2804	1.02406	67712.7	0.518953	395.867	218.037	2.66992	223.247	3.23125	279.531	23.4632	218.037	2.66992
297Y-2-Spot 015	0.24128	1.25308	0.0341654	0.870991	0.69508	19.5154	0.90088	115782	0.868775	601.778	216.565	1.85493	219.468	2.47321	251.733	20.7257	216.565	1.85493
297Y-2-Spot 039	0.241381	1.52246	0.0341364	1.1252	0.739067	19.4907	1.02558	67859.1	2.54105	468.271	216.384	2.39435	219.551	3.00591	254.646	23.6046	216.384	2.39435
305Y-2-Spot 217	0.251519	1.52286	0.0354283	0.825628	0.542155	19.413	1.27963	381394	1.31389	378.923	224.433	1.8211	227.809	3.10761	263.784	29.3534	224.433	1.8211
305Y-2-Spot 182	0.22439	2.40914	0.0342201	1.38359	0.57431	21.0179	1.97221	3466.22	0.944122	194.966	216.906	2.95117	205.557	4.48309	78.3358	46.8405	216.906	2.95117
305Y-2-Spot 119	0.244659	1.41791	0.0351177	1.08049	0.762028	19.7823	0.918159	15100	1.84222	585.742	222.499	2.36306	222.228	2.83003	220.393	21.251	222.499	2.36306
305Y-2-Spot 197	0.22866	2.28291	0.0348604	1.34225	0.587956	21.0114	1.84663	3293.76	0.602007	75.3414	220.897	2.91476	209.092	4.31399	79.0743	43.8561	220.897	2.91476
305Y-2-Spot 243	0.250434	1.6786	0.0352451	1.34007	0.798325	19.3963	1.0109	139323	1.05542	554.569	223.292	2.94105	226.929	3.4136	265.76	23.2194	223.292	2.94105
319Y-2-Spot 059	0.26806	1.32228	0.0371445	1.08469	0.820318	19.0975	0.75622	19918.9	2.13893	710.124	235.109	2.50425	241.141	2.83821	301.317	17.235	235.109	2.50425
319Y-2-Spot 153	0.27031	1.33285	0.0380563	0.9608	0.720863	19.4033	0.923766	33559.1	1.69041	455.405	240.773	2.27068	242.941	2.87981	264.936	21.2014	240.773	2.27068
319Y-2-Spot 033	0.269687	1.26559	0.0384414	0.874326	0.690847	19.645	0.91502	14178.6	2.48774	328.53	243.165	2.08646	242.443	2.72952	236.451	21.1076	243.165	2.08646
319Y-2-Spot 016	0.276178	1.36139	0.0386318	1.05864	0.777615	19.2783	0.85596	311309	3.17498	494.108	244.347	2.53833	247.621	2.99151	279.784	19.5711	244.347	2.53833
319Y-2-Spot 071	0.267223	1.96162	0.0386781	1.46282	0.745721	19.9482	1.30694	10982.3	2.44875	239.698	244.634	3.51151	240.471	4.20018	201.034	30.3461	244.634	3.51151
319Y-2-Spot 073	0.27808	1.7631	0.0388656	1.25514	0.71189	19.2623	1.23821	27968.3	2.97238	198.567	245.798	3.02702	249.133	3.89512	281.681	28.34	245.798	3.02702
319Y-2-Spot 159	0.271253	2.23995	0.0402895	1.1282	0.503671	20.4705	1.93508	3663.64	2.51063	86.6388	254.627	2.8167	243.695	4.85303	140.647	45.4316	254.627	2.8167
319Y-2-Spot 106	0.282136	1.68794	0.0409367	1.02051	0.604592	19.9971	1.3445	29030.8	3.02292	91.7135	258.636	2.58717	252.351	3.77148	195.357	31.2667	258.636	2.58717
319Y-2-Spot 137	0.296952	2.03417	0.0413118	1.1608	0.570651	19.1734	1.67044	12158.1	2.17179	118.073	260.959	2.96872	264.017	4.72914	292.24	38.1649	260.959	2.96872
319Y-2-Spot 129	0.318202	1.62514	0.0447447	1.06166	0.653269	19.3799	1.23044	12806	0.954907	195.639	282.176	2.93112	280.518	3.98332	267.697	28.2247	282.176	2.93112
319Y-2-Spot 264	0.323465	1.49302	0.0448076	0.989269	0.662594	19.0914	1.11824	13193.3	1.98723	259.943	282.564	2.73494	284.565	3.70522	302.044	25.479	282.564	2.73494
